# Supplementary material
Source: publisher figshare collection journal article supplement (https://future-science-group.figshare.com/ndownloader/files/34444709)

**SUPPLEMENTARY DOCUMENTS**

## Appendix Figure 1: Flowchart of study selection

**Number of papers found through database searches n=**

CNKI n=0

Wanfang n=0

Pubmed n=46

Cochrane n=312

**Records identified through**

**ESMO/ASCO/WCLC/CSCO**

**Discard duplicates based on citation**

**n= 44**

**Citations screened at abstract level**

**n= 314**

**Excluded after abstract review**

**n= 292**

**Detailed screening of articles**

**n= 22**

**Excluded after content review**

**n= 17**

Reasons for exclusions:

No appropriate population = 6

No appropriate Intervention = 1

No appropriate Comparator =4

No interest Outcomes = 1

No appropriate study design = 5

Abstracts included in data extraction

**n = 4**

**Articles eligible for inclusion**

**n= 5**

## Appendix Figure 2: Quality assessment for included trials


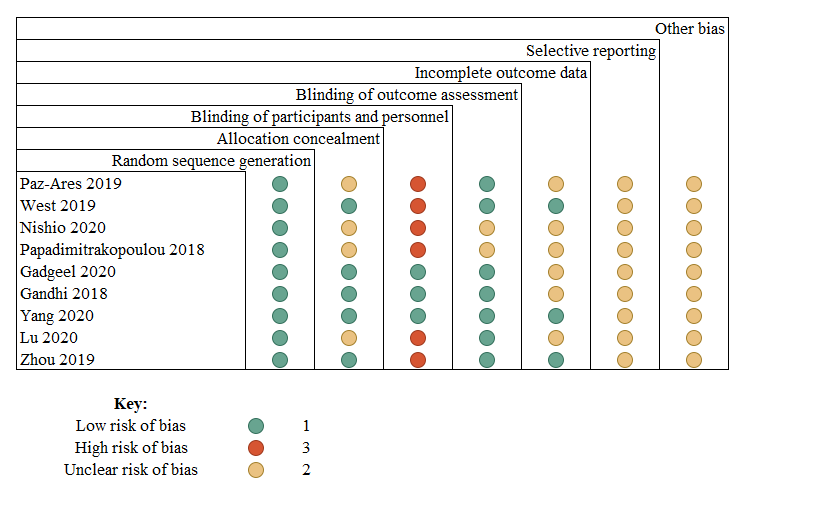

Supplement: Supplementary file 1 [file 34444709]
